# Supplementary material for: Gluconolactone Alleviates Myocardial Ischemia/Reperfusion Injury and Arrhythmias via Activating PKCε/Extracellular Signal-Regulated Kinase Signaling
Source: PubMed Central journal article supplement (PMC8964113; doi:10.3389/fphys.2022.856699), 2022-03-14
Supplement: Table_1.pdf [file Table_1.pdf]

## *Supplementary Material*

**Supplementary Table 1 Potential targets of GDL by Swiss Target Prediction**

| <b>Number</b> | <b>Target</b>                                                                  | <b>Common name</b> | <b>Uniprot ID</b> | <b>ChEMBL ID</b> | <b>Target Class</b>       | <b>Probability*</b> | <b>Known actives (3D/2D)</b> |
|---------------|--------------------------------------------------------------------------------|--------------------|-------------------|------------------|---------------------------|---------------------|------------------------------|
| 1             | Protein kinase C delta<br>(by homology)                                        | PRKCD              | Q05655            | CHEMBL2996       | Kinase                    | 0.133391            | 0/19                         |
| 2             | Protein kinase C alpha                                                         | PRKCA              | P17252            | CHEMBL299        | Kinase                    | 0.133391            | 0 /105                       |
| 3             | Brain glycogen phosphorylase                                                   | PYGB               | P11216            | CHEMBL3856       | Enzyme                    | 0.133391            | 3/0                          |
| 4             | HMG-CoA reductase<br>(by homology)                                             | HMGCR              | P04035            | CHEMBL402        | Oxidoreductase            | 0.125076            | 0/41                         |
| 5             | Transient receptor potential cation channel subfamily V member 4 (by homology) | TRPV4              | Q9HBA0            | CHEMBL3119       | Voltage-gated ion channel | 0.125076            | 0/5                          |
| 6             | Liver glycogen phosphorylase                                                   | PYGL               | P06737            | CHEMBL2568       | Enzyme                    | 0.125076            | 3/0                          |
| 7             | NAD-dependent deacetylase sirtuin 2                                            | SIRT2              | Q8IXJ6            | CHEMBL4462       | Eraser                    | 0.125076            | 0/1                          |

|    |                                        |                                                     |                                                          |               |                                     |          |      |
|----|----------------------------------------|-----------------------------------------------------|----------------------------------------------------------|---------------|-------------------------------------|----------|------|
| 8  | Muscle glycogen phosphorylase          | PYGM                                                | P11217                                                   | CHEMBL3526    | Enzyme                              | 0.125076 | 6/0  |
| 9  | P-glycoprotein 1                       | ABCB1                                               | P08183                                                   | CHEMBL4302    | Primary active transporter          | 0.125076 | 0/33 |
| 10 | Kappa Opioid receptor                  | OPRK1                                               | P41145                                                   | CHEMBL237     | Family A G protein-coupled receptor | 0.125076 | 0/18 |
| 11 | Protein kinase C gamma (by homology)   | PRKCG                                               | P05129                                                   | CHEMBL2938    | Kinase                              | 0.125076 | 0/10 |
| 12 | Protein kinase C epsilon               | PRKCE                                               | Q02156                                                   | CHEMBL3582    | Kinase                              | 0.125076 | 0/18 |
| 13 | Protein kinase C eta (by homology)     | PRKCH                                               | P24723                                                   | CHEMBL3616    | Kinase                              | 0.125076 | 0/9  |
| 14 | Protein kinase C theta                 | PRKCQ                                               | Q04759                                                   | CHEMBL3920    | Kinase                              | 0.125076 | 0/11 |
| 15 | Gamma-secretase                        | PSEN2<br>PSENEN<br>NCSTN<br>APH1A<br>PSEN1<br>APH1B | P49810<br>Q9NZ42<br>Q92542<br>Q96BI3<br>P49768<br>Q8WW43 | CHEMBL2094135 | Protease                            | 0.125076 | 0/16 |
| 16 | 11-beta-hydroxysteroid dehydrogenase 1 | HSD11B1                                             | P28845                                                   | CHEMBL4235    | Enzyme                              | 0.125076 | 0/9  |

|    |                                                   |        |        |            |                                     |          |      |
|----|---------------------------------------------------|--------|--------|------------|-------------------------------------|----------|------|
| 17 | Platelet activating factor receptor (by homology) | PTAFR  | P25105 | CHEMBL250  | Family A G protein-coupled receptor | 0.116739 | 0/6  |
| 18 | Mu opioid receptor                                | OPRM1  | P35372 | CHEMBL233  | Family A G protein-coupled receptor | 0.116739 | 0/3  |
| 19 | Glucose transporter                               | SLC2A1 | P11166 | CHEMBL2535 | Electrochemical transporter         | 0.116739 | 0/1  |
| 20 | Brain adenylate cyclase 1                         | ADCY1  | Q08828 | CHEMBL2899 | Enzyme                              | 0.116739 | 0/31 |
| 21 | Vitamin D receptor                                | VDR    | P11473 | CHEMBL1977 | Nuclear receptor                    | 0.116739 | 0/2  |
| 22 | Carbonic anhydrase I                              | CA1    | P00915 | CHEMBL261  | Lyase                               | 0.116739 | 6/8  |
| 23 | Carbonic anhydrase IX                             | CA9    | Q16790 | CHEMBL3594 | Lyase                               | 0.116739 | 11/8 |

---
